# Supplementary material for: C60(OH)22: a potential histone deacetylase inhibitor with anti-angiogenic activity
Source: Royal Society of Chemistry journal article supplement (doi:10.1039/c6nr04875g), 2016-01-01
Supplement: c6nr04875g1.pdf [file c6nr04875g1.pdf]

### Supplementary materials

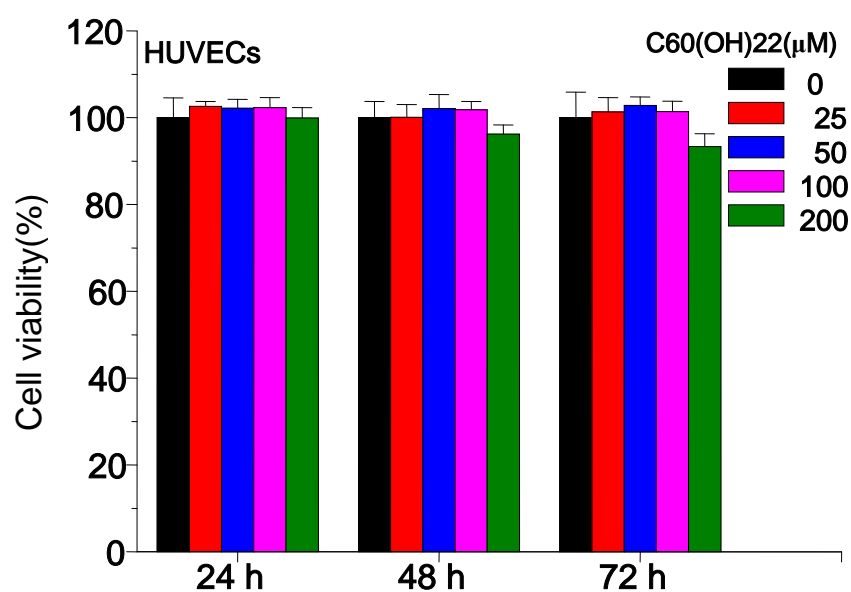

**Figure S1.** Effects of  $C_{60}(OH)_{22}$  on HUVEC cell viability. Each experiment was repeated for three times.

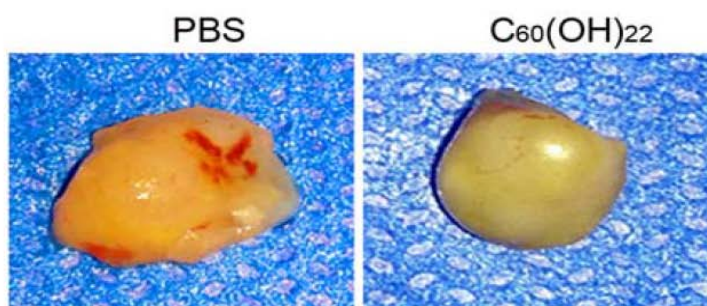

**Figure S2.** General observation of intact matrigel plugs. Obvious blood capillaries are formed in PBS group compared to  $C_{60}(OH)_{22}$  group in the surface of matrigel plugs.
